# Supplementary material
Source: PubMed Central journal article supplement (PMC6200640)
Supplement: NIHMS1505511-supplement-1.pdf [file NIHMS1505511-supplement-1.pdf]

**Supplemental Table S1. Characteristics of strains and their mutant derivatives used in this study**

| <b>Strain</b>              | <b>Characteristics</b>                                                                                                                                       |
|----------------------------|--------------------------------------------------------------------------------------------------------------------------------------------------------------|
| F62                        | Isolated in 1962 (Atlanta, USA); Proline auxotroph; Expresses PorB.1B                                                                                        |
| F62 $\Delta$ lgtA          | F62 <i>lgtA::kan<sup>R</sup></i> ; LOS expresses lactose from HepI                                                                                           |
| Ctx-r(Spain)               | Isolated in Spain. CRO-R (CRO MIC 1.5 $\mu$ g/ml); NG-MAST sequence type 1407                                                                                |
| Ctx-r(Spain) $\Delta$ lgtA | Ctx-r(Spain) <i>lgtA::kan<sup>R</sup></i>                                                                                                                    |
| H041                       | Isolated in Japan; CRO-R (CRO MIC 2-4 $\mu$ g/ml); NG-MAST sequence type ST4220; MLST sequence type ST7363                                                   |
| H041 $\Delta$ lgtA         | H041 <i>lgtA::kan<sup>R</sup></i>                                                                                                                            |
| MS11                       | Isolated in 1970 from male with uncomplicated urethritis; PorB.1B-9; has been used in human male volunteer model of gonorrhea.                               |
| MS11 $\Delta$ lgtA         | MS11 <i>lgtA::kan<sup>R</sup></i>                                                                                                                            |
| MS11 Opa-                  | MS11 with all 11 opa genes deleted                                                                                                                           |
| UMNJ60_06UM (NJ-60)        | Isolated from endocervix in Nanjing, China (2013).                                                                                                           |
| UMNJ60_06UM $\Delta$ lgtA  | UMNJ60_06UM <i>lgtA::kan<sup>R</sup></i>                                                                                                                     |
| FA1090                     | Isolated from endocervix of a woman with probable disseminated gonococcal infection in the 1970s; PorB.1B-3; used in human male volunteer model of gonorrhea |
| FA1090 $\Delta$ lgtA       | FA1090 <i>lgtA::kan<sup>R</sup></i>                                                                                                                          |
| FA1090 Opa-                | FA1090 with all 11 opa genes deleted                                                                                                                         |

CRO-R, ceftriaxone resistant; MIC, minimum inhibitory concentration; NG-MAST, *Neisseria gonorrhoeae* multi-antigen sequence typing; MLST, multi-locus sequence typing; Por, Porin; lgt, LOS glycosyltransferase; Opa, Opacity protein

**Supplemental Table S2. Characteristics of GISP strains used in this study**

| Study Site | Study Month | Study Number | MIC A (µg/ml; Etest) |        |       | NG-MAST | PorB Allele | TbpB Allele | PenA Genotype |
|------------|-------------|--------------|----------------------|--------|-------|---------|-------------|-------------|---------------|
|            |             |              | CRO                  | CFX    | AZI   |         |             |             |               |
| OC         | 2           | 14           | 0.064                | 0.016  | 0.19  | 3307    | 30          | 743         | non-mosaic    |
| OC         | 12          | 7            | 0.032                | 0.016  | 1     | 8535    | 4760        | 4           | non-mosaic    |
| SD         | 11          | 3            | 0.032                | 0.032  | 0.25  | 2400    | 1489        | 563         | non-mosaic    |
| SD         | 5           | 5            | 0.094                | 0.125  | 0.5   | 1407    | 908         | 110         | XXXIV         |
| SD         | 7           | 8            | 0.064                | 0.032  | 0.25  | 2400    | 1489        | 563         | non-mosaic    |
| SD         | 1           | 15           | 0.094                | 0.125  | 0.38  | 1407    | 908         | 110         | XXXIV         |
| SF         | 12          | 2            | 0.047                | 0.125  | 0.38  | 1407    | 908         | 110         | XXXIV         |
| SF         | 7           | 6            | 0.008                | 0.016  | 0.125 | 8424    | 292         | 743         | non-mosaic    |
| SF         | 7           | 7            | 0.006                | <0.016 | 0.38  | 8481    | 4883        | 29          | non-mosaic    |

OC, Orange County; SD, San Diego; SF, San Francisco; MIC, Minimum Inhibitory Concentration; CRO, ceftriaxone; CFX, cefixime; AZI, azithromycin; NG-MAST, *Neisseria gonorrhoeae* Multi-Antigen Sequence Typing; PorB, Porin B; TbpB, Transferrin binding protein B

## Supplemental Figure S1

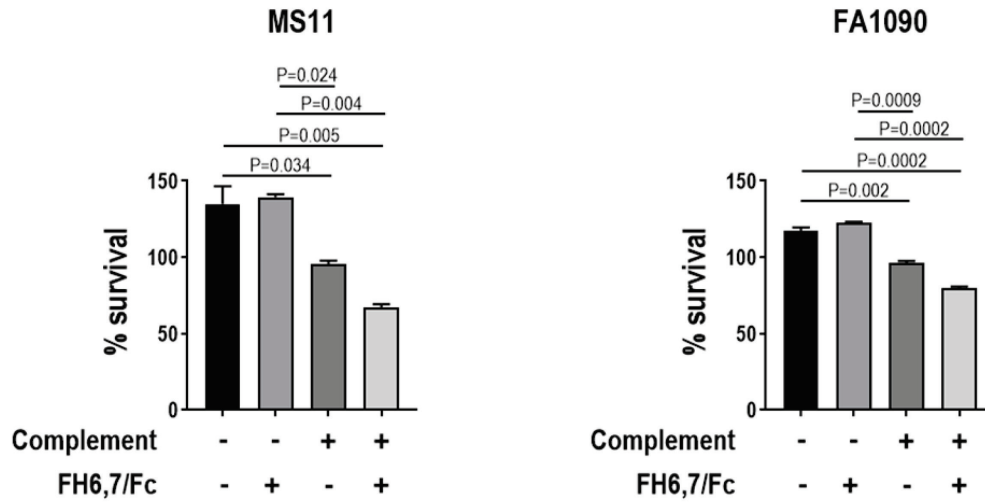

**Supplemental Figure S1.** Opsonophagocytic killing of Opa-negative mutants of *N. gonorrhoeae* MS11 and FA1090 by FH6,7/Fc and complement. Opa-negative MS11 (left graph) and FA1090 (right graph) were incubated with FH6,7/Fc (67  $\mu\text{g/ml}$ ) and 10% (v/v) human complement (IgG and IgM depleted normal human serum), followed by the addition of  $10^6$  freshly isolated human PMNs (multiplicity of infection 1:1) for 60 min at 37°C. Bacterial survival at 60 min relative to 0 min is shown on the Y-axis (mean [range] of two independently performed experiments). Controls included reactions where complement and/or FH6,7/Fc was omitted. Comparisons across groups was made by one-way ANOVA (P=0.003 for MS11 and P=0.0001 for FA1090) and pairwise comparisons (indicated with the graphs) by Tukeys multiple comparisons test.

Supplemental Figure S2

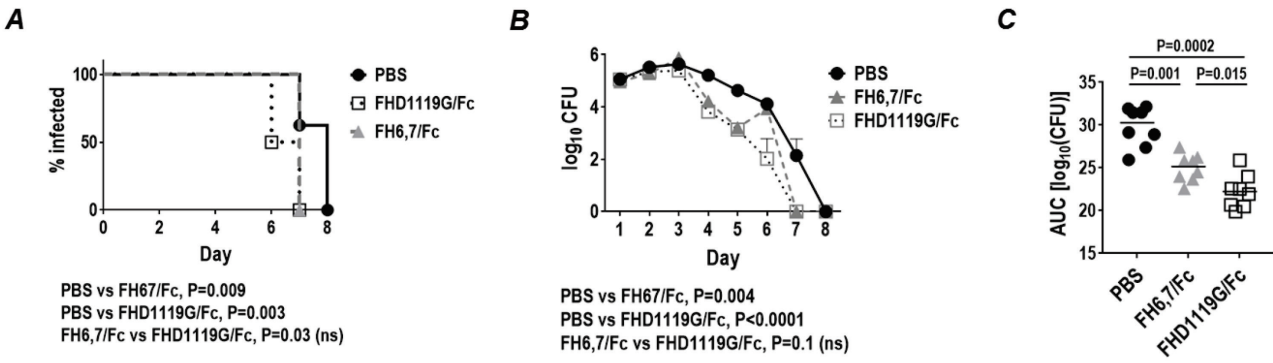

**Supplemental Figure S2.** Efficacy of FH6,7/Fc and FHD1119G/Fc against FA1090 in the mouse vaginal colonization model using FH/C4BP dual transgenic (Tg) mice. Premarin<sup>®</sup>-treated FH/C4BP dual Tg mice (n=8/group) were given  $7 \times 10^7$  CFU strain FA1090 intravaginally on Day 0 and treated intravaginally daily with 10  $\mu$ g/d of either FH6,7/Fc (dashed grey lines and triangles) or FHD1119G/Fc (dotted black lines and non-filled squares) or 10  $\mu$ l/d PBS (control; solid black line and circles) from Day 0 to Day 8. Vaginas were swabbed daily to enumerate CFU. **A.** Kaplan Meier curves showing time to clearance of infection. Groups were compared using the log-rank (Mantel-Cox) test. Significance was set at 0.017 (Bonferroni's correction for comparisons across three groups). **B.** Log<sub>10</sub> CFU versus time. X-axis, day; Y-axis, log<sub>10</sub> CFU. **C.** Bacterial burdens consolidated over time (Area Under the Curve [log<sub>10</sub> CFU] analysis) for the two groups. The three groups were compared using the non-parametric Kruskal-Wallis equality of populations rank test. The  $\chi^2$  with ties (two degrees of freedom) was 16.96 (P=0.0002) Pairwise comparisons across groups was made with the Two-sample Wilcoxon rank-sum (Mann-Whitney) test.
